# Supplementary material for: A novel ddPCR™ assay for eDNA detection and quantification of Greater Amberjack Seriola dumerilli and three congeners in US waters: challenges and application to fisheries independent surveys
Source: PeerJ. 2025 Jan 27;13:e18778. doi: 10.7717/peerj.18778 (PMC11781265; doi:10.7717/peerj.18778)
Supplement: Supplemental Information 1 — Sampling distance from reef and number of meters drifted during sampling, calculated current, cast duration, current speed and environmental data collected. [file peerj-13-18778-s001.xls]

## Sheet: Raw dataset 1
	Supplementary raw dataset 1 showing eDNA sampling details. Includes sampling distance from reef and number of meters drifted during sampling, calculated current, cast duration, current speed and environmental data collected.
	Day	eDNA sampling timepoint	Distance		Cast duration (min)	Current (m/min)	Environmental data collected with a CTD
			from reef (m)	drifted (added m)
							Salinity	Temp	Oxygen	pH	depth
	1	Bf	33	35	3	11.6667	35.8	26.7	3.5	7.9	35.8
		Bt	32	30	3	10	35.8	26.6	3.6	7.9	35.9
		Af	24	-17	5	-3.4	35.6	27.2	3.6	7.8	33.3
	2	Bf	20	31	3	10.3333	35.7	27.2	4.3	7.8	32.2
		Bt	9	35	6	5.83333	35.7	27.2	4.8	7.8	32.3
		Af	25	22	1	22	35.7	27.1	4.1	7.8	32.5
	3	Bf	52	43	2	21.5	35.8	26.7	4.1	7.8	35.2
		Bt	21	69	3	23	35.8	26.7	4.1	7.8	35.7
		Af	14	84	5	16.8	35.8	26.7	4.1	7.8	35.4
	4	Bf	72	48	2	24	35.7	27.2	4.6	7.8	32.4
		Bt	46	64	3	21.3333	35.7	27.2	4.8	7.8	32.3
		Af	92	18	2	9	35.7	27.3	4.6	7.8	32.2
	5	Bf	17	34	2	17	35.9	26.8	4.4	7.8	35.95
		Bt	4	26	2	13	35.9	26.7	4.5	7.8	35.7
		Af	11	52	3	17.3333	35.9	26.7	4.5	7.8	35.6
	Average		31.4667	38.2667	3	14.6267	35.7667	26.9333	4.24	7.81333	34.1633
	SD		23.768	23.1588	1.31656	7.33681	0.0869227	0.254733	0.407922	0.0339935	1.62383
