# Supplementary material for: A novel ddPCR™ assay for eDNA detection and quantification of Greater Amberjack Seriola dumerilli and three congeners in US waters: challenges and application to fisheries independent surveys
Source: PeerJ. 2025 Jan 27;13:e18778. doi: 10.7717/peerj.18778 (PMC11781265; doi:10.7717/peerj.18778)
Supplement: Supplemental Information 2 — Data is provided by acoustic (VPA) and camera gears (ROV, Trap and S-BRUV) in number of fish (n) and respective standard deviations (sd). eDNA data obtained before (Bf), between (Bt) and after (Af) camera gears is expressed in concentration (copies/μL) with respective coefficient of variation (CV). Values in shaded grey are eDNA concentrations above the LoQ of 0.35 copies/μL for S. dumerili and the LoQ of 0.49 copies/μL for S. rivoliana. Data is provided for the five sampling days on alternate site 1 and site 2 (non-available is NA). [file peerj-13-18778-s002.xls]

## Sheet: Raw dataset 2
	Supplementary raw dataset 2 showing detection and abundance data for S. dumerili, S. rivoliana and Seriola (all, genus level). Data is provided by acoustic (VPA) and camera gears (ROV, Trap and S-BRUV) in number of fish (n) and respective standard deviations (sd). EDNA data obtained before (Bf), between (Bt) and after (Af) camera gears is expressed in concentration (copies/μL) with respective coe…
	Identification		Day	Site	Acoustic		Camera (mobile)		Camera (stationary)				eDNA
					VPS	VPSsem	ROV	Rsd	Trap	Tsd	S-BRUV	Ssd	Before	CV Bf	Between	CV Bt	After	CV Af
	Seriola dumerili		1	2	NA	NA	12	0	8	7.51	0.5	0.58	0.01	1.41	2.40	0.65	3.68	0.71
			2	1	56	16	3.33	1.53	2	2.45	0.67	1.15	1.87	0.03	0.14	0.88	1.84	0.07
			3	2	45	27	3.33	1.53	1.5	1.73	6.75	11.59	0.90	0.24	1.36	0.38	0.66	0.07
			4	1	43	36	2.67	2.08	0.5	1	0	0	0	0	0.10	1.41	3.01	0.27
			5	2	170	154	14.33	4.93	3.33	1.53	1.25	1.5	0.20	1.23	3.45	0.48	1.71	0.74
	Seriola rivoliana		1	2	NA		1	0	0.8	0.84	1	2	0.01	1.41	0.45	0.19	0.23	0.36
			2	1			2.33	1.53	0.75	0.96	1.67	2.89	1.13	1.35	0	0	0.33	0.30
			3	2			2.67	0.58	1	1.41	0.5	0.58	0.23	0.29	0.07	1.02	0.01	1.41
			4	1			0.67	1.15	0.75	0.96	0	0	0	0	0	0	0.01	1.41
			5	2			0.67	0.58	0.67	0.58	0.5	0.58	0.03	1.41	0.18	1.07	0.05	1.41
	Seriola		1	2	NA		12	0	8.2	7.46	13.5	15.93	NA
			2	1			3.33	1.53	2	2.45	2	2.65
			3	2			3.66	1.15	1.75	1.5	6.75	11.59
			4	1			2.67	2.08	1	1.15	0	0
			5	2			14.33	4.93	3.33	1.53	3.75	4.99
